# Supplementary material for: Reactogenicity and immunogenicity against MPXV of the intradermal administration of Modified Vaccinia Ankara compared to the standard subcutaneous route
Source: bioRxiv or medRxiv preprint supplement (doi:10.1101/2024.09.17.24313609), 2024-09-18
Supplement: Supplementary file [file media-1.pdf]

**Supplementary Table 1. Prevalence and risk of developing different grades of Systemic and Local Adverse Effects Following Immunisation (S-AEFIs and L-AEFIs) with MVA-BN Vaccine up to six days from fitting a multinomial logistic regression according to administration route - intradermal (ID) vs subcutaneous (SC).**

|                   |              | Prevalence of S-AEFIs and OR (ID vs. SC) up to 6 days from vaccination |            |                                  |         |                                 |         |
|-------------------|--------------|------------------------------------------------------------------------|------------|----------------------------------|---------|---------------------------------|---------|
| Systemic symptoms | max severity | ID n (%)                                                               | SC n (%)   | Unadjusted OR (95% CI) ID vs. SC | p-value | Adjusted* OR (95% CI) ID vs. SC | p-value |
| <i>Fatigue</i>    | None         | 401 (56.0)                                                             | 137 (60.9) | 1                                | 0.001   | 1                               | 0.856   |
|                   | Mild         | 174 (24.3)                                                             | 35 (15.6)  | 1.70 (1.13, 2.56)                |         | 0.85 (0.37, 1.98)               |         |
|                   | Moderate     | 106 (14.8)                                                             | 29 (12.9)  | 1.25 (0.79, 1.97)                |         | 1.41 (0.54, 3.69)               |         |
|                   | Severe       | 35 (4.9)                                                               | 24 (10.7)  | 0.50 (0.29, 0.87)                |         | 1.20 (0.38, 3.81)               |         |
| <i>Headache</i>   | None         | 500 (69.8)                                                             | 166 (73.8) | 1                                | 0.022   | 1                               | 0.065   |
|                   | Mild         | 152 (21.2)                                                             | 29 (12.9)  | 1.74 (1.13, 2.69)                |         | 2.66 (1.13, 6.27)               |         |
|                   | Moderate     | 47 (6.6)                                                               | 22 (9.8)   | 0.71 (0.42, 1.21)                |         | 0.95 (0.25, 3.67)               |         |
|                   | Severe       | 17 (2.4)                                                               | 8 (3.6)    | 0.71 (0.30, 1.66)                |         | 6.60 (0.68, 63.98)              |         |
| <i>Myalgia</i>    | None         | 567 (79.2)                                                             | 172 (76.4) | 1                                | 0.811   | 1                               | 0.970   |
|                   | Mild         | 92 (12.8)                                                              | 32 (14.2)  | 0.87 (0.56, 1.35)                |         | 1.03 (0.39, 2.72)               |         |
|                   | Moderate     | 38 (5.3)                                                               | 13 (5.8)   | 0.89 (0.46, 1.70)                |         | 1.11 (0.26, 4.73)               |         |
|                   | Severe       | 19 (2.7)                                                               | 8 (3.6)    | 0.72 (0.31, 1.67)                |         | 1.47 (0.31, 6.94)               |         |
| <i>Nausea</i>     | None         | 646 (90.2)                                                             | 199 (88.4) | 1                                | 0.176   | 1                               | 0.895   |
|                   | Mild         | 49 (6.8)                                                               | 15 (6.7)   | 1.01 (0.55, 1.83)                |         | 1.20 (0.31, 4.71)               |         |
|                   | Moderate     | 11 (1.5)                                                               | 9 (4.0)    | 0.38 (0.15, 0.92)                |         | 0.53 (0.09, 3.02)               |         |
|                   | Severe       | 10 (1.4)                                                               | 2 (0.9)    | Nd                               |         | Nd                              |         |
| <i>Chills</i>     | None         | 656 (91.6)                                                             | 202 (89.8) | 1                                | 0.260   | 1                               | 0.803   |
|                   | Mild         | 35 (4.9)                                                               | 15 (6.7)   | 0.72 (0.38, 1.34)                |         | 0.89 (0.25, 3.09)               |         |
|                   | Moderate     | 13 (1.8)                                                               | 7 (3.1)    | 0.57 (0.23, 1.45)                |         | 0.31 (0.03, 3.17)               |         |
|                   | Severe       | 12 (1.7)                                                               | 1 (0.4)    | Nd                               |         | Nd                              |         |
| <i>Vomit</i>      | None         | 710 (99.2)                                                             | 219 (97.3) | 1                                | 0.559   | 1                               | 0.993   |
|                   | Mild         | 3 (0.4)                                                                | 3 (1.3)    | 0.31 (0.06, 1.54)                |         | Nd                              |         |
|                   | Moderate     | 0 (0.0)                                                                | 3 (1.3)    | Nd                               |         | Nd                              |         |
|                   | Severe       | 3 (0.4)                                                                | 0 (0.0)    | Nd                               |         | Nd                              |         |

|                   |              | Prevalence of L-AEFIs and OR (ID vs. SC) |            |                         |         |                        |         |
|-------------------|--------------|------------------------------------------|------------|-------------------------|---------|------------------------|---------|
| Local symptoms    | max severity | ID n (%)                                 | SC n (%)   | Unadjusted OR ID vs. SC | p-value | Adjusted* OR ID vs. SC | p-value |
| <i>Redness</i>    | None         | 46 (6.5)                                 | 137 (60.9) | 1                       | <.001   | 1                      | <0.001  |
|                   | Mild         | 168 (23.6)                               | 43 (19.1)  | 11.63 (7.25, 18.67)     |         | 20.84 (6.05, 71.73)    |         |
|                   | Moderate     | 325 (45.6)                               | 25 (11.1)  | 38.72 (22.87, 65.54)    |         | 47.01 (13.15, 168.0)   |         |
|                   | Severe       | 173 (24.3)                               | 20 (8.9)   | 25.76 (14.56, 45.59)    |         | 36.37 (9.90, 133.7)    |         |
| <i>Induration</i> | None         | 67 (9.4)                                 | 121 (53.8) | 1                       | <.001   | 1                      | <0.001  |
|                   | Mild         | 264 (37.1)                               | 51 (22.7)  | 9.35 (6.12, 14.27)      |         | 10.84 (4.11, 28.57)    |         |
|                   | Moderate     | 281 (39.5)                               | 36 (16.0)  | 14.10 (8.92, 22.28)     |         | 12.95 (4.55, 36.83)    |         |
|                   | Severe       | 100 (14.0)                               | 17 (7.6)   | 10.62 (5.86, 19.25)     |         | 14.20 (4.28, 47.14)    |         |
| <i>Pain</i>       | None         | 257 (36.1)                               | 60 (26.7)  | 1                       | 0.057   | 1                      | <0.001  |
|                   | Mild         | 266 (37.4)                               | 90 (40.0)  | 0.69 (0.48, 1.00)       |         | 0.21 (0.10, 0.48)      |         |
|                   | Moderate     | 147 (20.6)                               | 58 (25.8)  | 0.59 (0.39, 0.90)       |         | 0.09 (0.03, 0.26)      |         |
|                   | Severe       | 42 (5.9)                                 | 17 (7.6)   | 0.58 (0.31, 1.08)       |         | 0.37 (0.09, 1.45)      |         |

\* Adjusted for age and HIV status; 95 CI: 95% Confidence Interval; Nd: not determined
