# Supplementary material for: Reactogenicity and immunogenicity against MPXV of the intradermal administration of Modified Vaccinia Ankara compared to the standard subcutaneous route
Source: bioRxiv or medRxiv preprint supplement (doi:10.1101/2024.09.17.24313609), 2024-09-18

**Supplementary Figure S1. Heatmap summarizing grade and duration of Systemic (Panel a) and Local Injection Site (Panel b) Adverse Effect Following Immunisation (S-AEFI and LIS-AEFI) with MVA-BN Vaccine within 28-days from vaccination according to route of vaccination [Sub-cutaneous (SC): N=225; Intra-dermal (ID): N=718]. Every row represents results for a participant between Days 1-28 which are presented as columns. Cells are color-coded by severity.**

## Systemic (S-AEFI)

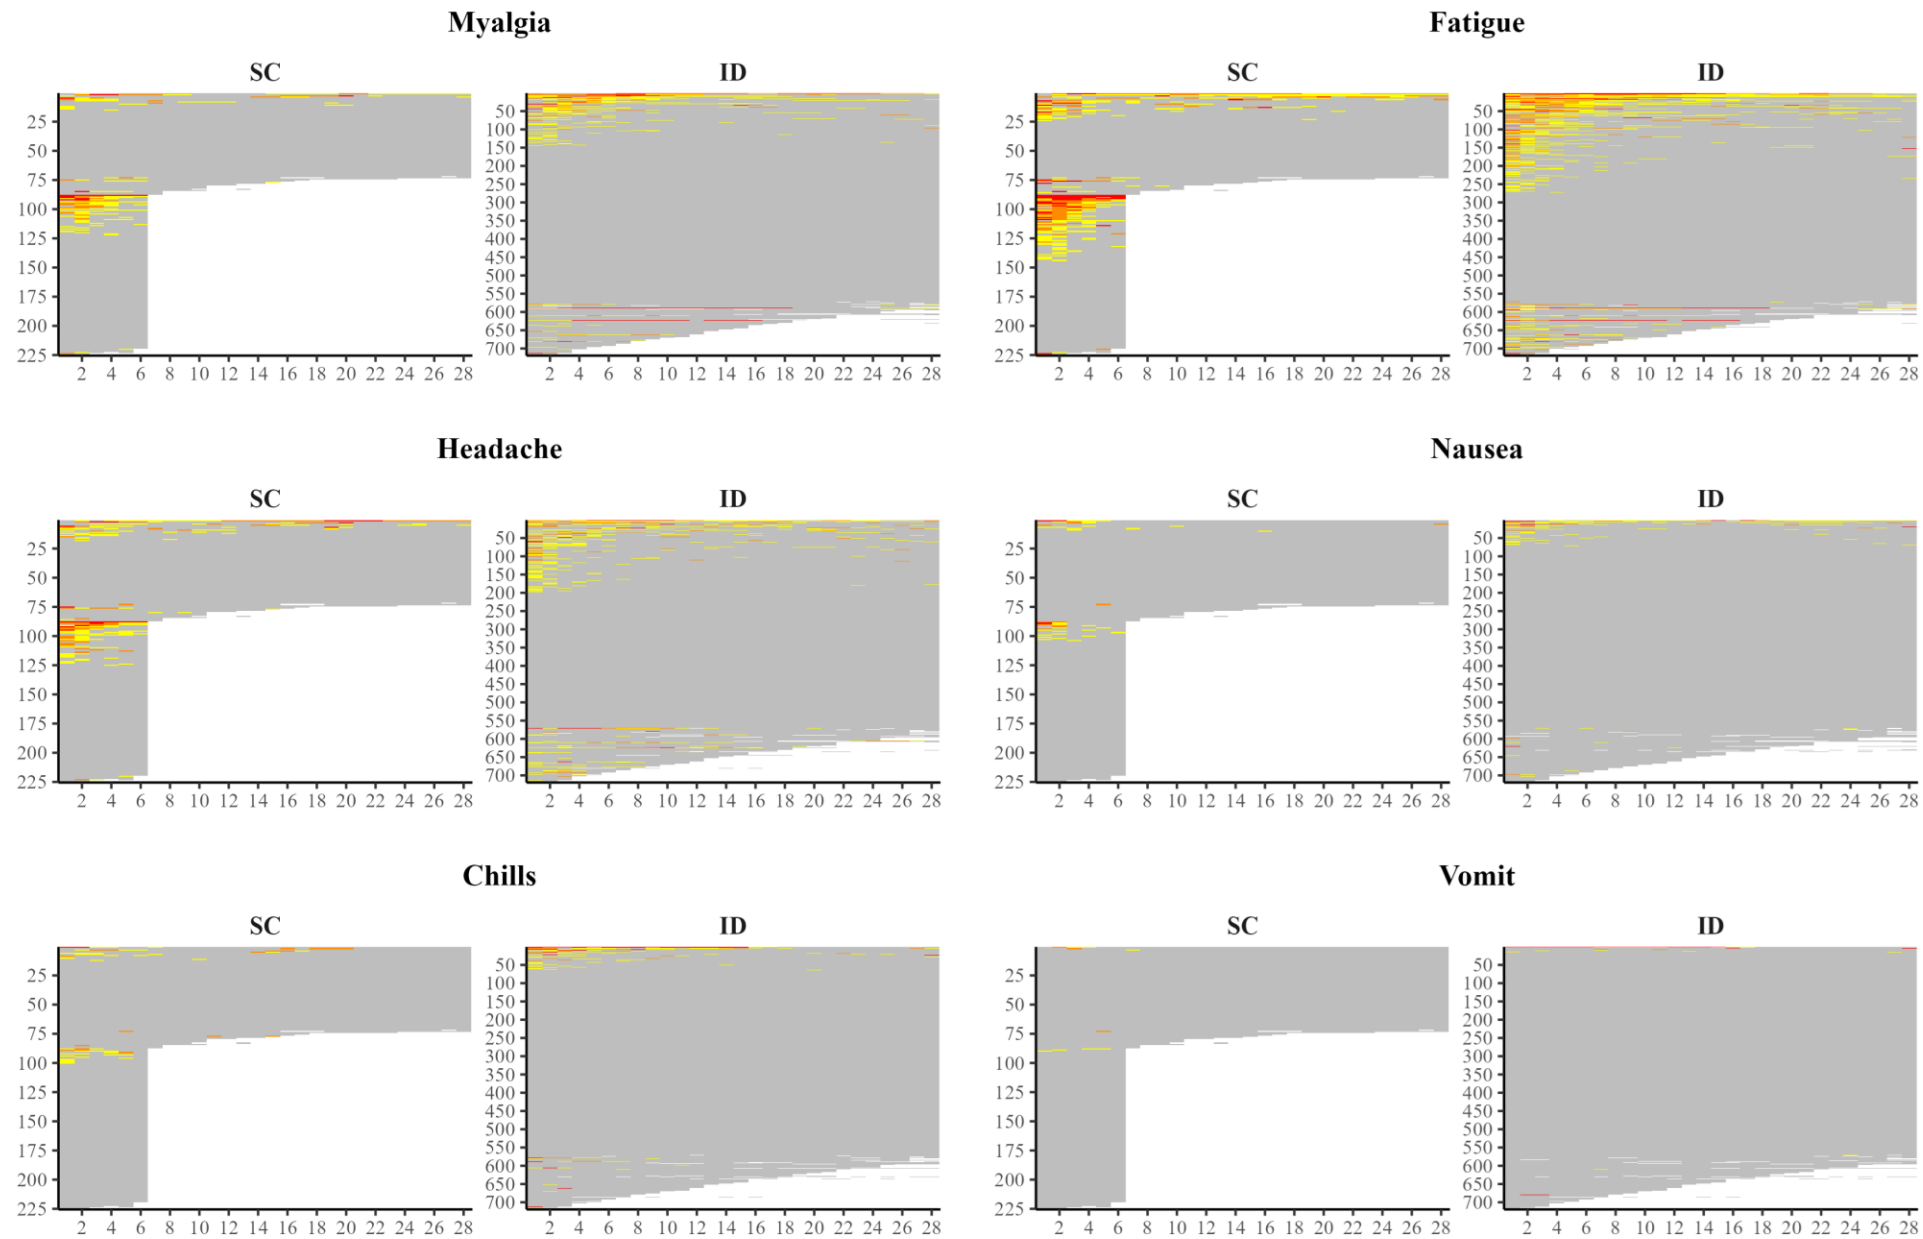

# Panel b

## Local Injection Site (LIS-AEFI)

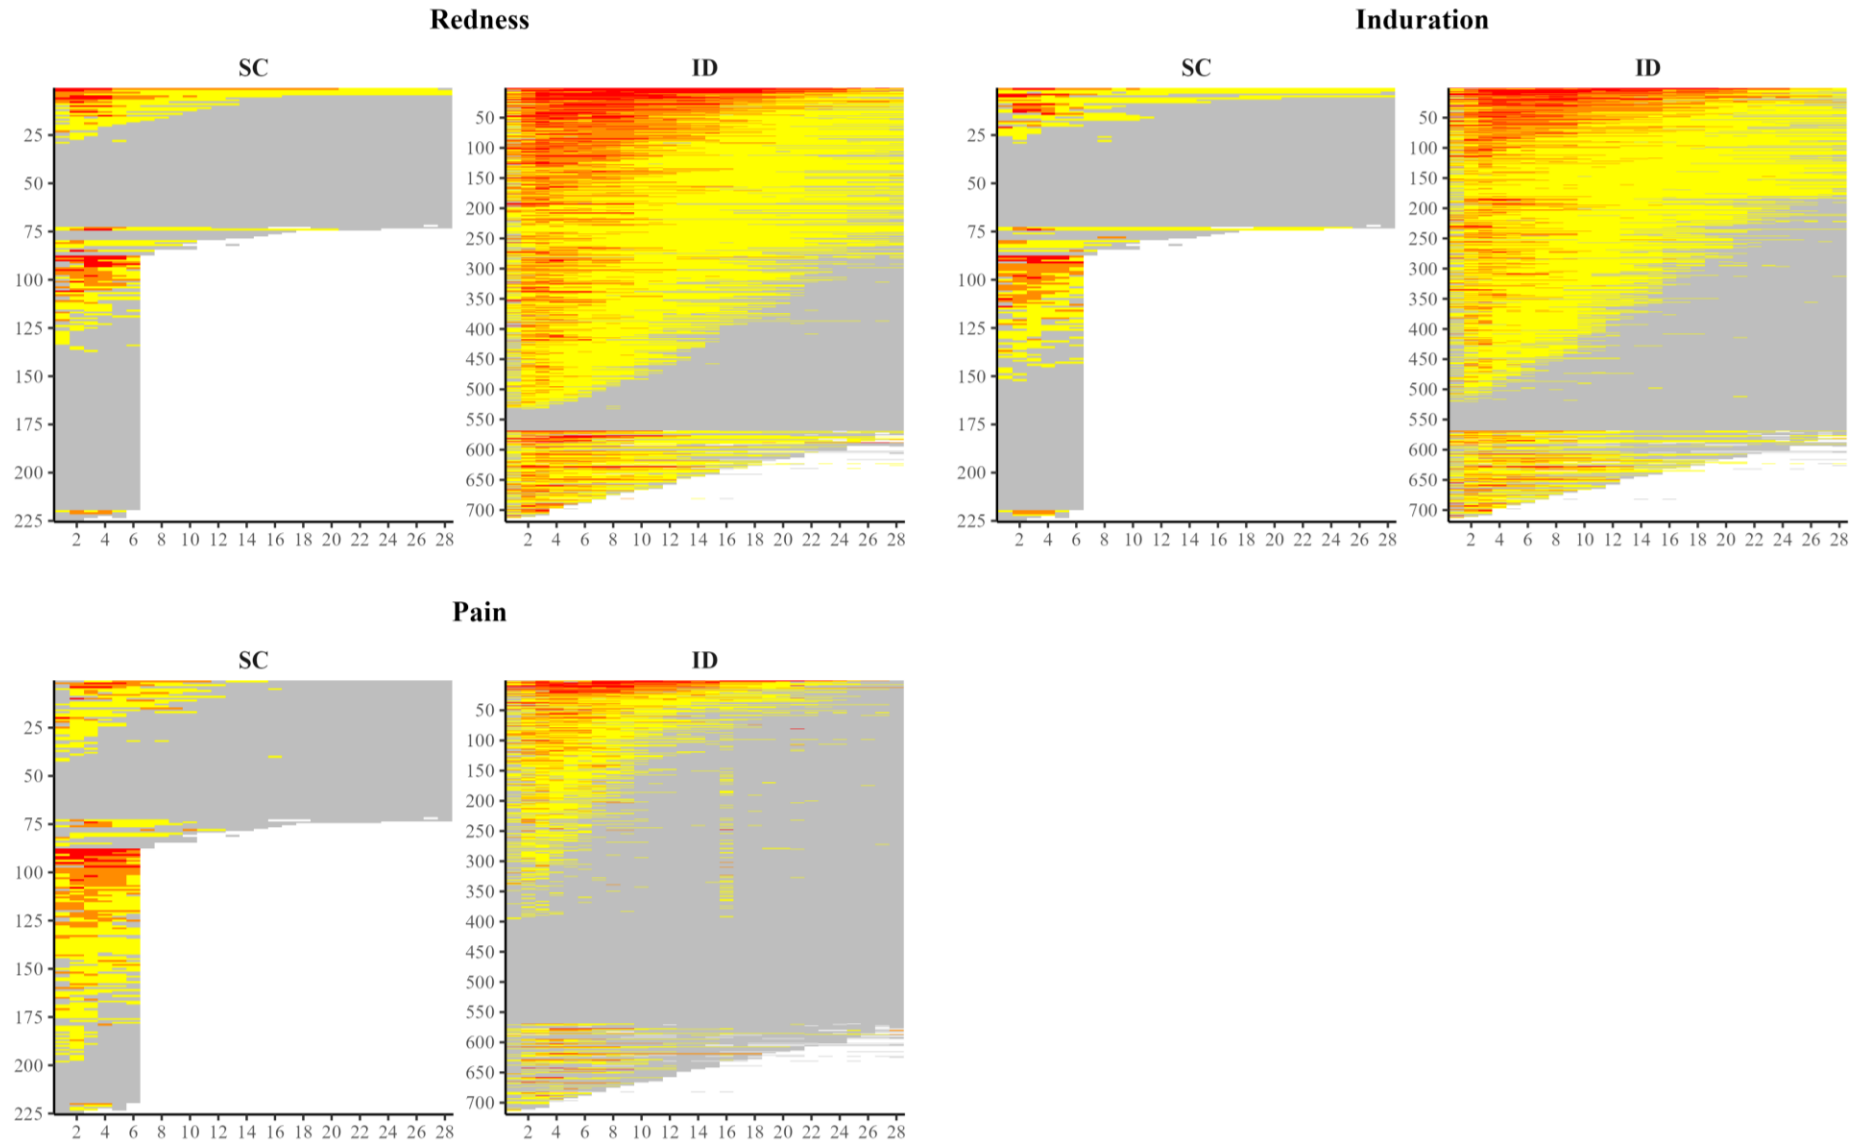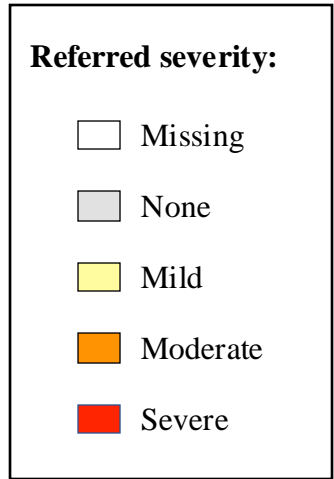

Supplement: Supplementary file [file media-2.pdf]
